## RESEARCH ARTICLE

# Acid–base regulation in the air-breathing swamp eel (*Monopterus albus*) at different temperatures

Phan Vinh Thinh<sup>1</sup>, Nguyen Thanh Phuong<sup>1</sup>, Colin J. Brauner<sup>2</sup>, Do Thi Thanh Huong<sup>1</sup>, Andrew T. Wood<sup>3</sup>, Garfield T. Kwan<sup>4</sup>, Justin L. Conner<sup>5</sup>, Mark Bayley<sup>6</sup> and Tobias Wang<sup>6,7,\*</sup>

## ABSTRACT

Vertebrates reduce arterial blood pH (pHa) when body temperature increases. In water breathers, this response occurs primarily by reducing plasma  $\text{HCO}_3^-$  levels with small changes in the partial pressure of  $\text{CO}_2$  ( $P_{\text{CO}_2}$ ). In contrast, air breathers mediate the decrease in pHa by increasing arterial  $P_{\text{CO}_2}$  ( $P_{\text{aCO}_2}$ ) at constant plasma  $\text{HCO}_3^-$  by reducing lung ventilation relative to metabolic  $\text{CO}_2$  production. Much less is known about bimodal breathers, which utilize both water and air. Here, we characterized the influence of temperature on arterial acid–base balance and intracellular pH ( $\text{pH}_i$ ) in the bimodal-breathing swamp eel, *Monopterus albus*. This teleost uses the buccopharyngeal cavity for gas exchange and has very reduced gills. When exposed to ecologically relevant temperatures (20, 25, 30 and 35°C) for 24 and 48 h, pHa decreased by  $-0.025$  pH units ( $\text{U}$ )  $^\circ\text{C}^{-1}$  in association with an increase in  $P_{\text{aCO}_2}$ , but without changes in plasma  $[\text{HCO}_3^-]$ .  $\text{pH}_i$  was also reduced with increased temperature. The slope of  $\text{pH}_i$  of liver and muscle was  $-0.014$  and  $-0.019$   $\text{U}$   $^\circ\text{C}^{-1}$ , while the heart muscle showed a smaller reduction ( $-0.008$   $\text{U}$   $^\circ\text{C}^{-1}$ ). When exposed to hypercapnia (7 or 14 mmHg) at either 25 or 35°C, *M. albus* elevated plasma  $[\text{HCO}_3^-]$  and therefore seemed to defend the new pHa set-point, demonstrating an adjusted control of acid–base balance with temperature. Overall, the effects of temperature on acid–base balance in *M. albus* resemble those in air-breathing amniotes, and we discuss the possibility that this pattern of acid–base balance results from a progressive transition in  $\text{CO}_2$  excretion from water to air as temperature rises.

**KEY WORDS:**  $P_{\text{CO}_2}$ , Bimodal breathing, Blood gases, Intracellular pH

## INTRODUCTION

All animals, with a few notable exceptions, decrease the pH of their bodily fluids as temperature increases (e.g. Truchot, 1987; Ultsch and Jackson, 1996; Stinner and Hartzler, 2000; Burton, 2002; Wang and Jackson, 2016). In aquatic ectothermic vertebrates, the reduction in blood pH is primarily associated with a reduction in the plasma  $\text{HCO}_3^-$  concentration at constant partial pressure of  $\text{CO}_2$  ( $P_{\text{CO}_2}$ ), whilst air-breathing vertebrates reduce blood pH by increasing  $P_{\text{CO}_2}$  through a reduction in ventilation relative to

metabolic  $\text{CO}_2$  production (Randall and Cameron, 1973; Larry, 1979; Austin et al., 1927; Smatresk and Cameron, 1982; Cameron and Kormanik, 1982; Boutilier et al., 1987; Amin-Naves et al., 2004). This marked difference in strategy probably stems from water breathers being obliged to maintain high ventilation rates because of the low solubility of oxygen in water, whilst air breathers are endowed with the luxury of modulating acid status through ventilatory adjustments (Rahn, 1966). As an obvious benefit, the respiratory modulation of acid–base status obviates the need for transepithelial ion exchange and the associated osmotic disturbances that ensue (Austin et al., 1927; Burton, 2002).

While differences between water and air breathers remain a cherished topic among comparative physiologists, relatively little is known about the influence of temperature on acid–base status in bimodal breathers (e.g. air-breathing fishes that utilize both air and water for gas exchange). The transition from water to air breathing is associated with an elevation of blood  $\text{CO}_2$  levels due to the reduced ventilation in air relative to water (Rahn, 1966). Consequently, many air-breathing fish have much higher arterial  $P_{\text{CO}_2}$  ( $P_{\text{aCO}_2}$ ) levels than water-breathing fish (e.g. Cameron and Wood, 1978; Shartau and Brauner, 2014). This has implications for the influence of temperature on acid–base status because an increase in temperature is expected to increase the reliance on air breathing as metabolism rises ('the  $Q_{10}$  effect'). Therefore, an increase in temperature is likely to induce a passive rise in  $P_{\text{aCO}_2}$  in bimodal breathers as the partitioning of gas exchange shifts from water to air. Indeed, two studies on the facultative air-breathing freshwater gar (*Lepisosteus oseus* and *Lepisosteus oculatus*) have demonstrated a clear and reversible elevation of  $P_{\text{aCO}_2}$  with an increase in temperature (Rahn et al., 1971; Smatresk and Cameron, 1982). Further, when forced to employ air breathing through exposure to hypoxic water, the facultative air breather *Pangasianodon hypophthalmus* also exhibits an increase in  $P_{\text{aCO}_2}$  with an increase in temperature (Damsgaard et al., 2018).

The purpose of the present study was to extend our understanding of the influence of temperature on acid–base regulation in an air-breathing teleost, *Monopterus albus* (Asian swamp eel, Zuiw 1793). *Monopterus albus* is an obligate air-breathing teleost that thrives in muddy ponds, swamps and other stagnant freshwater bodies in tropical Southeast Asia. The metabolic rate of *M. albus* conforms to a normal  $Q_{10}$  of around 2 (Lefevre et al., 2016). The gills of *M. albus* are greatly reduced and have a low capacity for gas exchange. Instead, oxygen uptake occurs primarily over the highly vascularized epithelium of the buccopharyngeal cavity and oesophagus, and is facilitated by a very high blood–oxygen affinity (Shih, 1940; Rainboth, 1996; Iversen et al., 2013; Damsgaard et al., 2014). Current climate models have suggested that temperature in the Mekong area might increase from 27°C to as much as 33°C within the coming century (MRC, 2009). As an air breather with gills that possess a modest capacity for gas exchange, *M. albus* has a rather high  $P_{\text{aCO}_2}$  (10–20 mmHg; Damsgaard et al.,

<sup>1</sup>College of Aquaculture and Fisheries, Can Tho University, Can Tho City, Vietnam.

<sup>2</sup>Department of Zoology, University of British Columbia, 6270 University Blvd, Vancouver, BC, V6T 1Z4 Canada. <sup>3</sup>CSIRO Agriculture and Food, Hobart, TAS 7004, Australia. <sup>4</sup>Scripps Institution of Oceanography, University of California San Diego, La Jolla, CA 92037, USA. <sup>5</sup>University of Northern Texas, Denton, TX 76203, USA.

<sup>6</sup>Zoophysiology, Department of Bioscience, Aarhus University, 8000 Aarhus C, Denmark. <sup>7</sup>Aarhus Institute of Advanced Studies, 8000 Aarhus C, Denmark.

\*Author for correspondence (tobias.wang@bios.au.dk)

 T.W., 0000-0002-4350-3682

2014) and has been reported to tolerate a broad thermal range (8–40°C; Shafland et al., 2009; Lefevre et al., 2016). However, the effects of temperature on intracellular pH ( $pH_i$ ) changes are not known.

Our study had three specific aims. Firstly, we wished to establish how arterial acid–base balance and plasma ion concentrations were affected by temperatures within the range of 20 to 35°C. These measurements were performed on chronically cannulated fish exposed to a progressive rise in temperature. In addition, although most proteins and their biological functions reside within the cells, little is known about the influence of temperature on intracellular acid–base status. A second aim of our study was therefore to measure  $pH_i$  in separate groups of fish kept at four temperatures (20, 25, 30 and 35°C). Whilst these previous two objectives describe the influence of temperature, our third aim was to establish whether the reduction in arterial pH (pHa) with temperature is indeed regulated. To address this question, we exposed *M. albus* to two levels of hypercapnia (7 and 14 mmHg in water and air) at both 25 and 35°C to investigate whether they defend pHa at a given temperature by metabolic compensation in response to the induced mild respiratory acidosis.

## MATERIALS AND METHODS

### Experimental animals

Asian swamp eels (*Monopterus albus*) of both sexes and a mean body mass of 342±9 g were purchased from a commercial farm in the Mekong Delta in southern Vietnam and kept at the University of Can Tho for 3–6 weeks before the experiments were performed. During this period, the eels were kept in aerated 300 l tanks maintained at 27°C and provided with stiff plastic tape as shelter. Animal experiments were conducted in accordance with European Union guidelines.

### Surgery and catheterization of the dorsal aorta

The swamp eels were anaesthetized by submergence in a benzocaine solution (225 mg l<sup>-1</sup>) for 20–30 min until they stopped spontaneous movement, and were then transferred to an operating table in a supine position. A 2–4 cm incision in the abdominal cavity provided access to the coeliac artery for cannulation with polyethylene tubing (PE50) containing heparinized saline (50 IU per 1 ml saline). The incision was closed with stitches and the catheter was secured to the skin. The surgery lasted <20 min and eels were allowed to recover for 24 h individually in small tanks with aerated water at room temperature (27°C).

### Experimental design

#### Series 1: effects of temperature on arterial acid–base status

We measured arterial acid–base status and plasma ion concentration in six eels as temperature was increased progressively from 20 to 25, 30 and 35°C. Each temperature was maintained for 48 h whereupon fish were sampled, and the temperature was gradually increased to the next target value over the subsequent 2–3 h. Sampling consisted of drawing 1 ml of arterial blood from the dorsal aorta at 24 and 48 h for each temperature level, which was analysed immediately for pHa,  $P_{aCO_2}$ , total CO<sub>2</sub> concentration of the plasma, haemoglobin concentration ([Hb]) and haematocrit (Hct), while plasma samples were frozen for subsequent measurement of plasma ion concentration and osmolality.

#### Series 2: effects of temperature on $pH_i$

We measured  $pH_i$  of liver, heart and muscle at each of the four temperatures (20, 25, 30 and 35°C). For each temperature, we performed measurements on six individuals that had been

maintained at the relevant temperature for 24 h. None of these fish were instrumented with catheters and they had therefore not been anaesthetized prior to sampling. The eels were killed quickly by a sharp blow to the head, allowing rapid tissue removal (2–4 min) through an incision. All tissue samples were wrapped in aluminium foil before immersion in liquid N<sub>2</sub>, after which they were held at –80°C until measurements were made.

#### Series 3: effects of temperature on the metabolic compensation of arterial pH

After recovering from surgery, eels were maintained at either 25 or 35°C in aerated normoxic water. A 1 ml arterial blood sample (control) was drawn, and the eels were then exposed to either

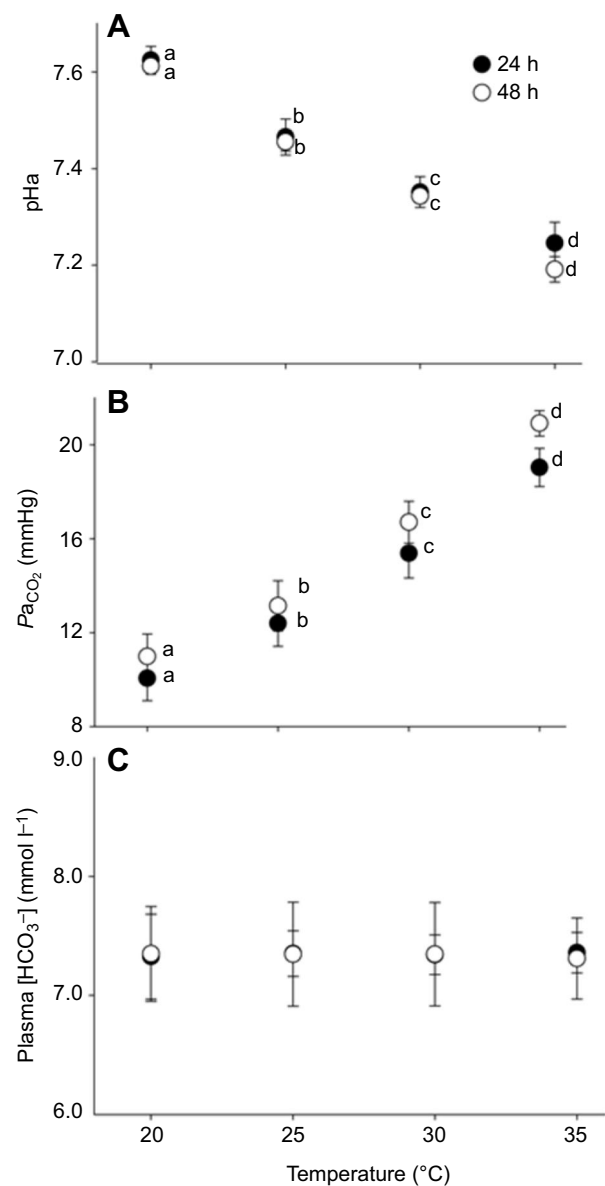

**Fig. 1. Effects of elevated temperature on arterial blood acid–base status.** Arterial pH (pHa; A), arterial partial pressure of carbon dioxide ( $P_{aCO_2}$ ; B) and plasma  $[HCO_3^-]$  (C) in cannulated *Monopterus albus* held at different temperatures for 24 and 48 h. Within each panel, letters that differ indicate statistically significant differences ( $P < 0.05$ ). A one-way ANOVA was used for comparison between different temperatures at a given time. Values are means±s.e.m. ( $N=6$ ).

**Table 1. Effects of elevated temperature on arterial plasma ion concentration**

| Temperature (°C) | [Na <sup>+</sup> ] (mmol l <sup>-1</sup> ) |                        | [K <sup>+</sup> ] (mmol l <sup>-1</sup> ) |                      | [Cl <sup>-</sup> ] (mmol l <sup>-1</sup> ) |                        | Osmolality (mOsm)      |                        |
|------------------|--------------------------------------------|------------------------|-------------------------------------------|----------------------|--------------------------------------------|------------------------|------------------------|------------------------|
|                  | 24 h                                       | 48 h                   | 24 h                                      | 48 h                 | 24 h                                       | 48 h                   | 24 h                   | 48 h                   |
| 20               | 123.5±1.3 <sup>a</sup>                     | 123.3±1.2 <sup>a</sup> | 2.8±0.2 <sup>a</sup>                      | 2.9±0.2 <sup>a</sup> | 111.1±3.1 <sup>a</sup>                     | 112.0±2.2 <sup>a</sup> | 287.3±3.1 <sup>a</sup> | 290.8±3.8 <sup>a</sup> |
| 25               | 123.1±1.8 <sup>a</sup>                     | 122.3±1.8 <sup>a</sup> | 2.9±0.2 <sup>a</sup>                      | 2.8±0.1 <sup>a</sup> | 111.2±4.0 <sup>a</sup>                     | 110.8±2.5 <sup>a</sup> | 290.0±2.5 <sup>a</sup> | 287.2±2.5 <sup>a</sup> |
| 30               | 124.4±1.6 <sup>a</sup>                     | 122.7±2.2 <sup>a</sup> | 2.9±0.2 <sup>a</sup>                      | 2.8±0.2 <sup>a</sup> | 111.8±2.0 <sup>a</sup>                     | 112.8±2.1 <sup>a</sup> | 287.2±3.5 <sup>a</sup> | 288.0±5.2 <sup>a</sup> |
| 35               | 123.3±1.7 <sup>a</sup>                     | 122.4±1.3 <sup>a</sup> | 3.3±0.1 <sup>a</sup>                      | 3.5±0.1 <sup>b</sup> | 112.8±3.5 <sup>a</sup>                     | 112.0±4.3 <sup>a</sup> | 287.0±2.3 <sup>a</sup> | 288.1±3 <sup>a</sup>   |

Arterial plasma Na<sup>+</sup>, K<sup>+</sup> and Cl<sup>-</sup> concentrations and osmolality of cannulated *Monopterus albus* following 24 and 48 h at 20, 25, 30 and 35°C. Letters that differ within a column indicate statistically significant differences ( $P<0.05$ ). A one-way ANOVA was used for comparison between different temperatures at a given time. Values are means±s.e.m. ( $N=6$ ).

normocapnia or hypercapnia (in both water and air simultaneously) of 7 or 14 mmHg CO<sub>2</sub> for 72 h (six fish in each group). During these exposures, a 1 ml arterial blood sample was taken at 24, 48 and 72 h. At both temperatures, we included an untreated control group that was maintained normocapnic in both air and water for the duration of the experiment. All blood samples were then analysed for arterial acid–base status and plasma ion concentration.

#### Analytical methods

pH<sub>a</sub> and PaCO<sub>2</sub> were measured with CG3+ cartridges on an iSTAT hand-held blood gas analyser where values were temperature compensated to the fish temperature, using the equation from the iSTAT manual (i-STAT Corporation, Princeton, NJ, USA) (Harter et al., 2014; Damsgaard et al., 2015). The total CO<sub>2</sub> concentration in the plasma was measured according to Cameron (1971), allowing for bicarbonate concentration in the plasma ([HCO<sub>3</sub><sup>-</sup>]) to be calculated by subtraction of dissolved CO<sub>2</sub> (PaCO<sub>2</sub>×α<sub>CO<sub>2</sub></sub>), using an appropriate carbon dioxide solubility (α<sub>CO<sub>2</sub></sub>) (Boutilier et al., 1985). [Hb] was measured spectrophotometrically at 540 nm after conversion to cyanmethaemoglobin using Drabkin's reagent, whilst Hct was determined as the fraction of packed red cells following centrifugation at 14,500 g (radius 9 cm) for 3 min. Plasma chloride concentration ([Cl<sup>-</sup>]) was determined by titration using a Sherwood chloride analyser (model 926S MK II, Sherwood Scientific Ltd, Cambridge, UK), while sodium and potassium concentrations were measured by flame photometry (model 420, Sherwood). Total osmolality was measured on a Fiske Model 210 Micro Osmometer (Advanced Instruments™ Fiske™ 210 Micro-Sample Osmometer, Norwood, MA, USA).

To measure pH<sub>i</sub>, heart, liver and muscle samples were ground to a fine powder under liquid N<sub>2</sub> (Pörtner et al., 1990; Brauner et al., 2004; Baker et al., 2009a,b). Approximately 0.1 g of the powder was placed in a 1.5 ml Eppendorf tube containing 0.8 ml of metabolic inhibitor cocktail [150 mmol l<sup>-1</sup> potassium fluoride and 6 mmol l<sup>-1</sup> nitrilotriacetic sodium (Na<sub>2</sub>NTA)]. The solution was immediately

vortexed for 30 s and centrifuged at 3000 g for 45 s. Then the pH of the supernatant (0.2 ml) was measured with a Mettler Toledo pH electrode. In all cases, the pH electrode was calibrated and

**Table 2. Effects of elevated temperature on arterial blood haemoglobin concentration and haematocrit**

| Temperature (°C) | [Hb] (mmol l <sup>-1</sup> ) |                      | Hct (%)               |                       |
|------------------|------------------------------|----------------------|-----------------------|-----------------------|
|                  | 24 h                         | 48 h                 | 24 h                  | 48 h                  |
| 20               | 8.1±0.1 <sup>a</sup>         | 8.4±0.1 <sup>a</sup> | 51.9±0.2 <sup>a</sup> | 52.5±0.3 <sup>a</sup> |
| 25               | 8.3±0.1 <sup>a</sup>         | 8.3±0.1 <sup>a</sup> | 52.2±0.3 <sup>a</sup> | 52.7±0.3 <sup>a</sup> |
| 30               | 8.4±0.1 <sup>a</sup>         | 8.3±0.1 <sup>a</sup> | 53.7±0.3 <sup>a</sup> | 53.9±0.3 <sup>a</sup> |
| 35               | 8.8±0.1 <sup>a</sup>         | 8.8±0.1 <sup>a</sup> | 54.4±0.2 <sup>a</sup> | 55.4±0.2 <sup>a</sup> |

Arterial blood haemoglobin concentration ([Hb]) and haematocrit (Hct) in cannulated *M. albus* following 24 h and 48 h at 20, 25, 30 and 35°C. A two-way ANOVA was used for comparison between different temperatures in a given time; there were no statistically significant differences. Values are means ±s.e.m. ( $N=6$ ).

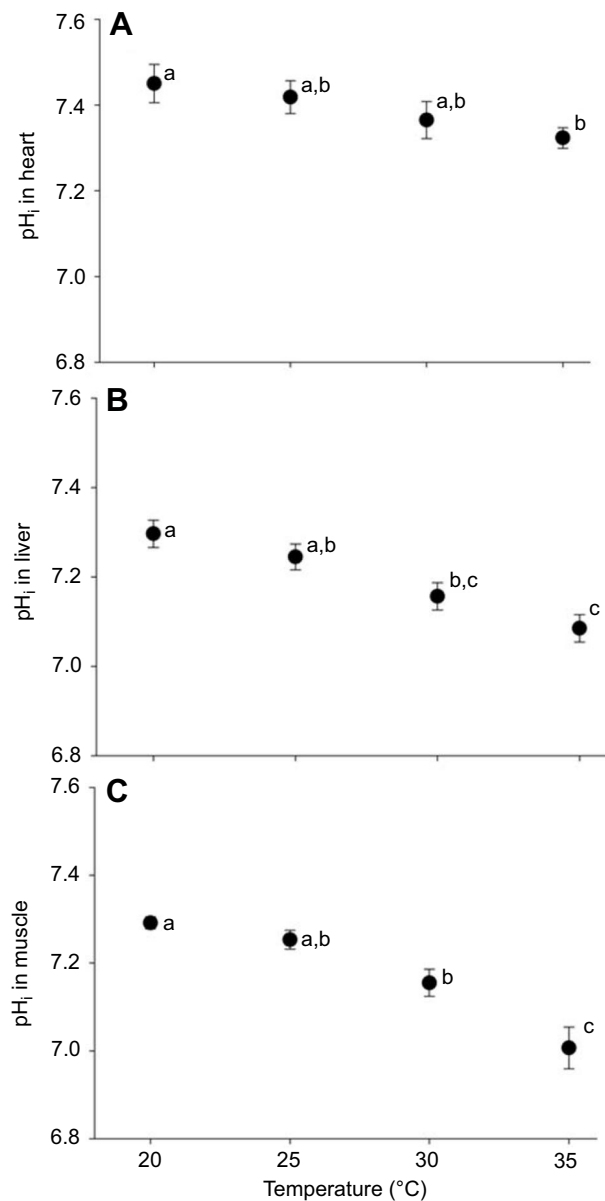

**Fig. 2. Effects of elevated temperature on intracellular pH.** Intracellular pH (pH<sub>i</sub>) in heart (A), liver (B) and muscle (C) of *M. albus* held at 20, 25, 30 or 35°C for 24 h. Letters that differ within a panel indicate statistically significant differences ( $P<0.05$ ). A one-way ANOVA was used for comparison between different temperatures at a given time. Values are means±s.e.m. ( $N=5$ ).

maintained at the same temperature as the fish, and the supernatant was measured at this temperature.

### Statistical analysis

A two-way ANOVA for repeated measures (a multivariate analysis of covariance) was used to test for an overall effect of temperature and hypercapnia on blood parameters followed by Duncan's *post hoc* test to identify difference amongst means. To evaluate the isolated effects of temperature, a one-way ANOVA was used. Data are presented as means±s.e.m. A probability (*P*) value of less than 0.05 was considered significant. All statistical analyses were performed using PASW Statistic 18.

## RESULTS

### Series 1: effects of temperature on arterial acid–base status

Arterial acid–base status in response to the progressive rise in temperature from 20 to 35°C is shown in Fig. 1; plasma ion concentrations and osmolality are shown in Table 1. The rise in temperature caused a virtually linear reduction in pHa with a slope of 0.025±0.001 and 0.028±0.001 U °C<sup>-1</sup> after 24 and 48 h at each temperature, respectively. These slopes did not differ significantly. The *P*<sub>aCO<sub>2</sub></sub> rose progressively from 10.1±1.0 mmHg at 20°C to 19.1±1.0 mmHg at 35°C (*P*<0.05). Plasma [HCO<sub>3</sub><sup>-</sup>] and ion concentrations were unaffected by temperature (Table 1). [Hb] and Hct were not affected by temperature (Table 2).

### Series 2: effects of temperature on pHi

Increased temperature also led to a reduction in pHi (Fig. 2). In cardiac tissue, pHi decreased from 7.45±0.04 (20°C) to 7.36±0.04

(30°C) (*P*>0.05), with a stronger and significant fall to 7.32±0.02 at 35°C (*P*<0.05). Over the same temperature range, liver tissue pHi decreased rapidly from 7.29±0.03 (20°C) to 7.08±0.03 (35°C) (*P*<0.05). The skeletal muscle showed the lowest pHi values, falling significantly from 7.29±0.02 to 7.00±0.04 (*P*<0.05) over the same temperature range.

### Series 3: effects of temperature on the metabolic compensation of arterial pH

The regulation of arterial acid–base status at the two levels of hypercapnia (7 and 14 mmHg in water and air) at 25 and 35°C is shown in Fig. 3 in comparison with the normocapnic controls. At 25°C, both levels of hypercapnia (7 and 14 mmHg) led to an elevation of *P*<sub>aCO<sub>2</sub></sub>, but pHa remained unaffected at 72 h because of an elevation of HCO<sub>3</sub><sup>-</sup> in the plasma. The effects of hypercapnia were less pronounced at 35°C, where *P*<sub>aCO<sub>2</sub></sub> was higher and pHa lower than at 25°C. Nevertheless, in response to 14 mmHg CO<sub>2</sub>, there was still a significant rise in plasma [HCO<sub>3</sub><sup>-</sup>] whilst pHa remained unaffected. Thus, while exposure to increased *P*<sub>CO<sub>2</sub></sub> had little effect on pHa (*P*=0.944), increased temperature caused a significant reduction in pHa (*P*=0.00001). Further, there was a significant effect of the combination of temperature and *P*<sub>CO<sub>2</sub></sub> (*P*=0.012). Plasma ion concentrations and osmolality remained unaffected by hypercapnia at either temperature (Table 3). Additionally, [Hb] and Hct did not change during hypercapnia (Table 4).

## DISCUSSION

*Monopterus albus* exhibited an archetypical reduction in plasma pH and a reduction in pHi of three major tissue types with an increase in temperature. The magnitude of the pHa reduction was larger than reported for most vertebrates, but the change in pH over the change in temperature ( $\Delta\text{pH}/\Delta T$ ) in *M. albus* is not exceptional (Malan et al., 1976; Heisler et al., 1976; Moalli et al., 1981; Cameron and Kormanik, 1982; Walsh and Moon, 1982; Boutilier et al., 1987; Amin-Naves et al., 2004; Fobian et al., 2014). The responses to temperature were relatively fast and appeared to be complete within 24 h as there were no changes from 24 to 48 h after the change in temperature, but we cannot exclude short-term effects (hours) upon temperature changes.

The pattern of acid–base regulation in *M. albus* differed markedly from the typical water-breathing teleost pattern because the

**Table 3. Combined effects of temperature and hypercapnia on arterial plasma ion concentration**

|                                             | 0 h       | 24 h      | 48 h      | 72 h      |
|---------------------------------------------|-----------|-----------|-----------|-----------|
| <b>Na<sup>+</sup> (mmol l<sup>-1</sup>)</b> |           |           |           |           |
| 25°C normocapnia                            | 139.8±1.6 | 140.2±1.5 | 140.7±2.4 | 139.3±1.3 |
| 25°C 7 mmHg CO <sub>2</sub>                 | 138.7±1.2 | 138.5±1   | 138.2±1.1 | 138.2±1.0 |
| 25°C 14 mmHg CO <sub>2</sub>                | 139.6±1.7 | 138.8±1.8 | 138.5±1.4 | 137.9±1.4 |
| 35°C normocapnia                            | 139.5±0.9 | 139.6±1   | 139.4±1.0 | 139.3±1.5 |
| 35°C 7 mmHg CO <sub>2</sub>                 | 140.7±1.4 | 139.6±2.1 | 138.4±1.2 | 137.0±0.9 |
| 35°C 14 mmHg CO <sub>2</sub>                | 138.9±1.4 | 137.1±1.4 | 136.8±1.2 | 136.2±1.0 |
| <b>K<sup>+</sup> (mmol l<sup>-1</sup>)</b>  |           |           |           |           |
| 25°C normocapnia                            | 2.9±0.4   | 2.9±0.2   | 3.0±0.4   | 3.0±0.4   |
| 25°C 7 mmHg CO <sub>2</sub>                 | 3.0±0.2   | 3.1±0.1   | 3.4±0.3   | 3.6±0.3   |
| 25°C 14 mmHg CO <sub>2</sub>                | 3.4±0.4   | 3.3±0.3   | 3.4±0.2   | 3.4±0.2   |
| 35°C normocapnia                            | 3.2±0.4   | 3.1±0.2   | 3.2±0.4   | 3.5±0.3   |
| 35°C 7 mmHg CO <sub>2</sub>                 | 3.2±0.3   | 3.5±0.6   | 3.4±0.2   | 3.3±0.6   |
| 35°C 14 mmHg CO <sub>2</sub>                | 2.5±0.6   | 3.4±0.3   | 3.4±0.3   | 3.5±0.4   |
| <b>Cl<sup>-</sup> (mmol l<sup>-1</sup>)</b> |           |           |           |           |
| 25°C normocapnia                            | 112.4±3.8 | 111.6±1.9 | 112.4±2.0 | 112.4±2.3 |
| 25°C 7 mmHg CO <sub>2</sub>                 | 112.0±3.6 | 111.2±1.2 | 112.1±1.6 | 111.9±2.4 |
| 25°C 14 mmHg CO <sub>2</sub>                | 111.9±0.8 | 110.2±1.5 | 109.9±0.4 | 109.7±0.9 |
| 35°C normocapnia                            | 112.0±1.4 | 112.2±2.2 | 112.3±2.3 | 111.8±2.0 |
| 35°C 7 mmHg CO <sub>2</sub>                 | 112.0±2.4 | 111.4±1.2 | 110.9±2.0 | 110.8±1.2 |
| 35°C 14 mmHg CO <sub>2</sub>                | 112.2±2.2 | 110.6±1.4 | 109.7±0.7 | 109.7±1.1 |
| <b>Osmolality (mOsm)</b>                    |           |           |           |           |
| 25°C normocapnia                            | 288.7±3.8 | 288.3±3.6 | 288.5±2.1 | 288.3±2.0 |
| 25°C 7 mmHg CO <sub>2</sub>                 | 288.5±3.3 | 288.1±3.3 | 288.3±3.1 | 288.1±1.5 |
| 25°C 14 mmHg CO <sub>2</sub>                | 288.3±2.8 | 286.3±2.9 | 285.5±2.1 | 286.1±3.4 |
| 35°C normocapnia                            | 289.6±1.0 | 289.5±1.2 | 289.3±1.0 | 289.5±1.3 |
| 35°C 7 mmHg CO <sub>2</sub>                 | 290.6±2.9 | 289.3±4.5 | 288.5±2.9 | 288.0±2.3 |
| 35°C 14 mmHg CO <sub>2</sub>                | 288.6±2.9 | 286.3±2.7 | 286.1±2.2 | 286.1±3.3 |

Arterial plasma Na<sup>+</sup>, K<sup>+</sup> and Cl<sup>-</sup> concentration and osmolality of cannulated *M. albus* after exposure to normocapnia or a *P*<sub>CO<sub>2</sub></sub> of 7 or 14 mmHg CO<sub>2</sub> at 25 or 35°C. Two-way ANOVA was used for comparison between different temperatures at a given time and data are means±s.e.m. (*N*=6).

**Table 4. Combined effects of temperature and hypercapnia on arterial blood [Hb] and Hct**

|                                   | 0 h      | 24 h     | 48 h     | 72 h     |
|-----------------------------------|----------|----------|----------|----------|
| <b>[Hb] (mmol l<sup>-1</sup>)</b> |          |          |          |          |
| 25°C normocapnia                  | 8.5±0.8  | 8.3±0.4  | 8.5±0.7  | 8.2±0.5  |
| 25°C 7 mmHg CO <sub>2</sub>       | 8.3±0.3  | 8.4±0.3  | 8.3±0.3  | 8.3±0.4  |
| 25°C 14 mmHg CO <sub>2</sub>      | 8.4±0.2  | 8.3±0.2  | 8.4±0.2  | 8.3±0.2  |
| 35°C normocapnia                  | 8.5±0.3  | 8.6±0.4  | 8.5±0.5  | 8.6±0.2  |
| 35°C 7 mmHg CO <sub>2</sub>       | 8.4±0.3  | 8.6±0.4  | 8.6±0.3  | 8.7±0.2  |
| 35°C 14 mmHg CO <sub>2</sub>      | 8.5±0.3  | 8.6±0.2  | 8.7±0.3  | 8.7±0.2  |
| <b>Hct (%)</b>                    |          |          |          |          |
| 25°C normocapnia                  | 49.6±1.5 | 49.5±1.3 | 49.4±0.7 | 49.5±1.6 |
| 25°C 7 mmHg CO <sub>2</sub>       | 50.3±0.5 | 49.9±1.0 | 49.8±1.0 | 49.1±2   |
| 25°C 14 mmHg CO <sub>2</sub>      | 50.5±0.4 | 50.0±0.4 | 49.6±0.5 | 49.2±0.4 |
| 35°C normocapnia                  | 51.7±1.6 | 51.1±1   | 51.8±1   | 52.1±1.9 |
| 35°C 7 mmHg CO <sub>2</sub>       | 52±1.4   | 51.0±1.3 | 51.4±1.3 | 51.4±1.8 |
| 35°C 14 mmHg CO <sub>2</sub>      | 50.5±0.5 | 51±0.5   | 51.5±0.7 | 51.8±0.7 |

Arterial blood [Hb] and Hct of cannulated *M. albus* after exposure to normocapnia, or a *P*<sub>CO<sub>2</sub></sub> of 7 or 14 mmHg at 25 or 35°C. Two-way ANOVA was used for comparison between different temperatures at a given time and data are means±s.e.m. (*N*=6).

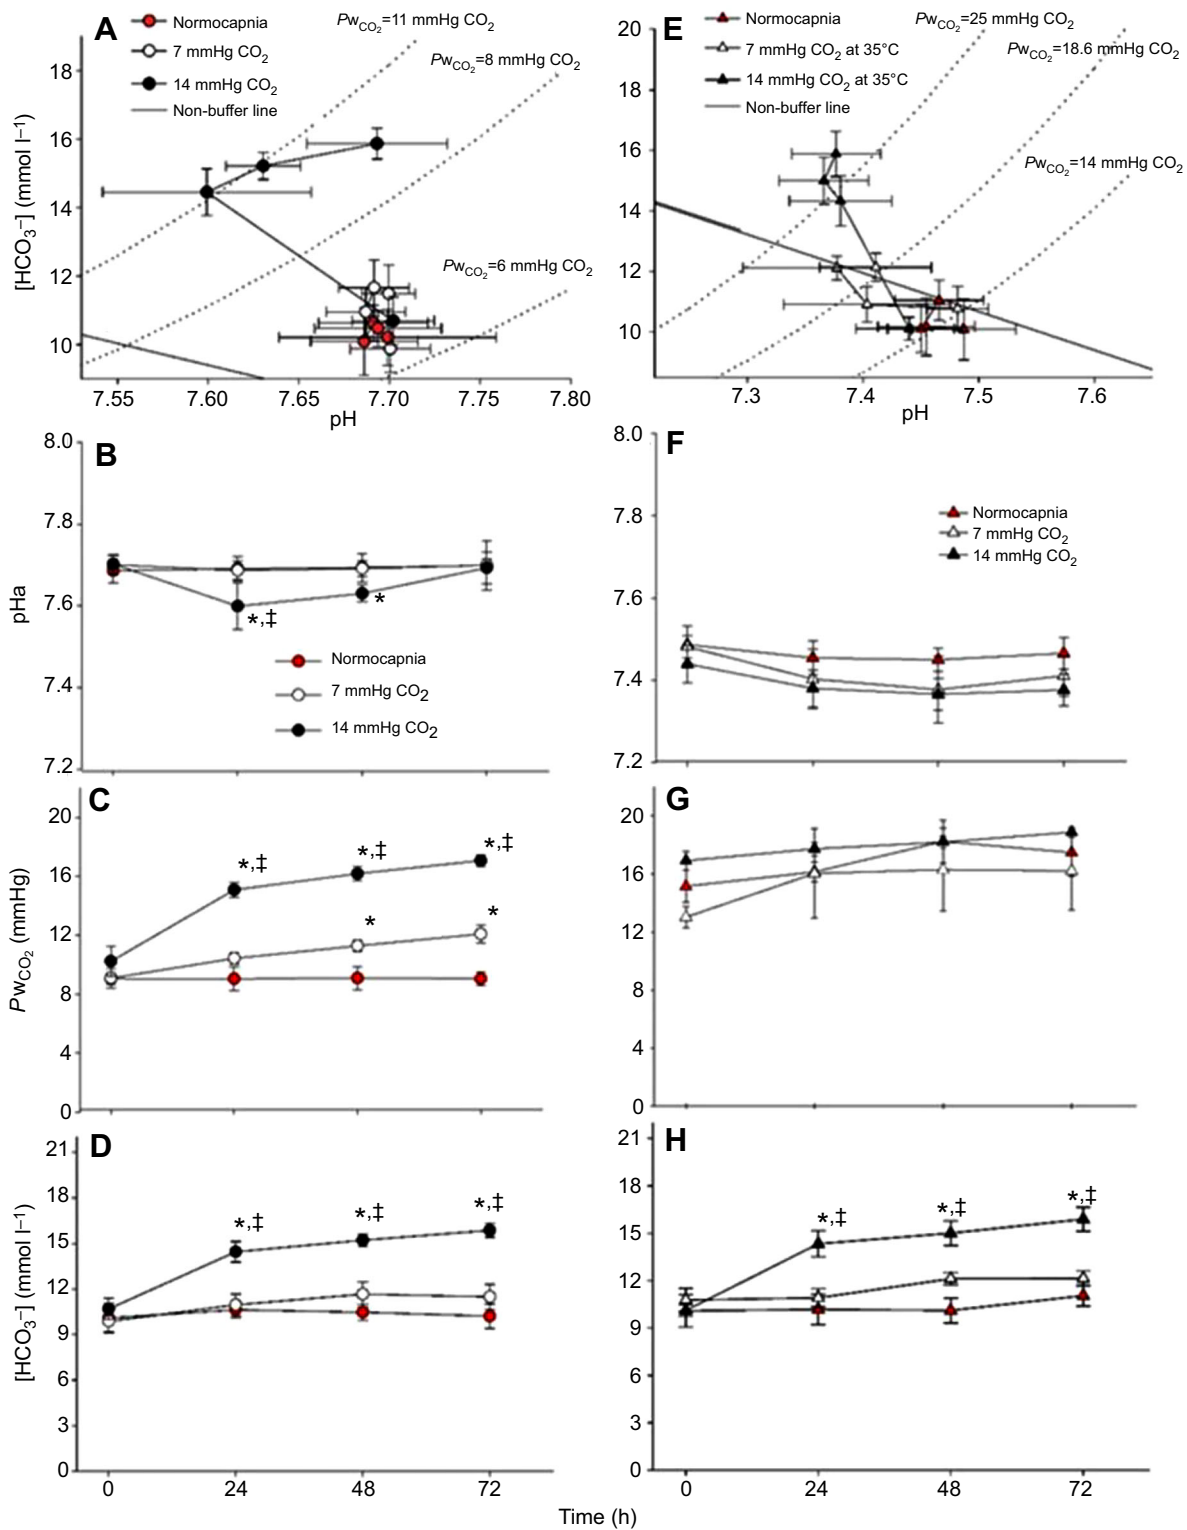

**Fig. 3. Effects of temperature on the metabolic compensation of pHa.** (A,E) Davenport diagram with CO<sub>2</sub> isopleths at  $P_{\text{aCO}_2}$  upon exposure to 7 mmHg CO<sub>2</sub> and 14 mmHg CO<sub>2</sub> at 25°C (A) and 35°C (E).  $P_{\text{wCO}_2}$ , partial pressure of CO<sub>2</sub> in water. pHa (B,F), partial pressure of CO<sub>2</sub> ( $P_{\text{CO}_2}$ ; C,G) and  $[\text{HCO}_3^-]$  (D,H) after exposure to normocapnia, or a  $P_{\text{CO}_2}$  of 7 or 14 mmHg CO<sub>2</sub> at 25°C (A–C) or 35°C (D–F). Asterisks indicate statistically significant differences from day 0 at a given  $P_{\text{CO}_2}$  and double daggers indicate a statistically significant difference from normocapnia at the respective sampling time. A two-way ANOVA was used for comparison between different temperatures at a given time. Values are means  $\pm$  s.e.m. ( $N=6$ ).

**Table 5. Comparison of extracellular and intracellular pH changes with temperature ( $\Delta\text{pH}/\Delta T$ ) in fish, amphibians and reptiles for comparison with values obtained in this study**

| Species                                                    | Temperature ( $^{\circ}\text{C}$ ) | $\Delta\text{pH}/\Delta T$ |               |                |            |               |
|------------------------------------------------------------|------------------------------------|----------------------------|---------------|----------------|------------|---------------|
|                                                            |                                    | Blood                      | White muscle  | Heart          | Red muscle | Liver         |
| Frog ( <i>Rana catesbeiana</i> ) <sup>1</sup>              | 3.5–30                             | –0.0204                    | –0.0152       |                |            |               |
| Turtle ( <i>Pseudemys scripta</i> ) <sup>2</sup>           | 9–32                               | –0.021                     | –0.014        |                |            | –0.023        |
| Dogfish ( <i>Scyliorhinus stellaris</i> ) <sup>3</sup>     | 10–23                              | –0.0148                    | –0.0178       | –0.0098        | –0.0334    |               |
| American eel ( <i>Aguilia rostrata</i> ) <sup>4</sup>      | 5–20                               | –0.0076                    | –0.009        | –0.0205        | –0.0033    | –0.0177       |
| Channa catfish ( <i>Ictalurus punctatus</i> ) <sup>5</sup> | 15–31                              | –0.0132                    | –0.015        | –0.012         | –0.018     |               |
| Anuran amphibians ( <i>Xenopus laevis</i> ) <sup>6</sup>   | 10–30                              | –0.017                     |               | –0.007         | –0.017     |               |
| Anuran amphibians ( <i>Bufo marinus</i> ) <sup>7</sup>     | 10–30                              | –0.015                     |               | 10.026         | –0.023     |               |
| <b>Swamp eel (<i>Monopterus albus</i>)<sup>8</sup></b>     | <b>20–35</b>                       | <b>–0.025</b>              | <b>–0.019</b> | <b>–0.0084</b> |            | <b>–0.014</b> |

<sup>1,2</sup>Malan et al. (1976); <sup>3</sup>Heisler et al. (1976); <sup>4</sup>Walsh and Moon (1982); <sup>5</sup>Cameron and Kormanik (1982); <sup>6,7</sup>Boutilier et al. (1987); and <sup>8</sup>present study (bold).

reduction in pH was mediated entirely by an elevation of  $P_{\text{aCO}_2}$  and plasma  $[\text{HCO}_3^-]$  remained unaffected. The influence of temperature on acid–base balance in *M. albus* therefore resembles the effect on air-breathing vertebrates where a fall in  $\text{pH}_a$  with increased temperature is achieved through a reduction in ventilation relative to  $\text{CO}_2$  production, which alleviates the need for transepithelial ion exchange. Consistent with this pattern, plasma ion concentrations remained unaffected by temperature in *M. albus*. This is the first clear report of this pattern in a teleost.

The pronounced rise in  $P_{\text{aCO}_2}$  of *M. albus* with elevated temperature is larger than that reported for other teleosts, but the overall response appears to reflect a general trend amongst the few air-breathing fishes that have been studied to date. In the lobe-finned South American lungfish (*Lepidosiren paradoxa*),  $P_{\text{aCO}_2}$  increases with temperature as a result of increased reliance on pulmonary gas exchange as metabolic  $\text{CO}_2$  production rises (Amin-Naves et al., 2004). Similarly, in the non-teleost ray-finned air-breathing garfish (*Lepisosteus osseus*),  $P_{\text{aCO}_2}$  is elevated during the higher summer temperatures compared with the colder winter months (Rahn et al., 1971). Within the teleost taxa, the facultative air-breathing striped catfish *Pangasianodon hypophthalmus* also elevates  $P_{\text{aCO}_2}$  with temperature when forced to air breathe in hypoxic water (Damsgaard et al., 2018). However, in this case, the elevation in  $P_{\text{aCO}_2}$  with elevated temperature is associated with a significant elevation of plasma  $[\text{HCO}_3^-]$ , and Damsgaard et al. (2018) argued that the transfer of gas exchange from water to air is attended by a passive increase in  $P_{\text{aCO}_2}$ , and the pH drop is fine-tuned by elevations in  $\text{HCO}_3^-$  through branchial ion exchange.

In *M. albus*, the acid–base changes in response to temperature resemble the classic pattern of tetrapods and lungfishes, where central chemoreception for  $\text{CO}_2$  (and probably pH) in the cerebrospinal fluid plays a major role in reducing pulmonary ventilation relative to metabolic  $\text{CO}_2$  production to elevate  $P_{\text{aCO}_2}$  as temperature rises (e.g. Hitzig and Jackson, 1978; Jackson, 1989; Branco et al., 1993; Amin-Naves et al., 2004). However, as a teleost fish, it seems unlikely that *M. albus* is in possession of central  $\text{CO}_2$  chemoreception (Milsom, 2010). Nevertheless, *M. albus* exhibits a vigorous ventilatory response to hypercapnia (M. Thomsen, M.B. and T.W., unpublished observation), and the putative role of peripheral chemoreceptors should be considered in future studies on the influence of temperature on the ventilatory regulation of acid–base balance in air-breathing fishes.

A simple explanation for the rise in  $P_{\text{aCO}_2}$  and the associated reduction in pH in *M. albus* is that it is likely that the rise in metabolic  $\text{CO}_2$  production with increased temperature imposes a transition from aquatic to aerial  $\text{CO}_2$  excretion. In this scenario, the rise in  $P_{\text{aCO}_2}$  can be seen as a simple passive consequence of the increased reliance on air breathing with increased temperature

(Lefevre et al., 2016) and the associated retention of  $\text{CO}_2$  (Rahn, 1966). Similar responses are characteristic of amphibians where gas exchange is partitioned between the lungs and skin (Wang et al., 1998a,b; Boutilier and Heisler, 1987), as well as in the lungless salamanders where the reduction in  $\text{pH}_a$  with increased temperature is due to an elevation of  $P_{\text{aCO}_2}$  because cutaneous conductance for  $\text{CO}_2$  changes very little with temperature (Moalli et al., 1981).

Following this argument, it was pertinent to investigate whether the temperature-induced change in  $\text{pH}_a$  constitutes a new regulated set-point. To address this question, we exposed *M. albus* to mild levels of hypercapnia at 20 and 30 $^{\circ}\text{C}$ . The results clearly showed that *M. albus* responds to the induced respiratory acidosis with an increase in plasma  $[\text{HCO}_3^-]$  and thus regulates  $\text{pH}_a$  to a temperature-specific value. There remains, therefore, little doubt that temperature changes the  $\text{pH}_a$  set point in a tightly regulated manner in this species. Further, this experiment also demonstrates that this species possesses the necessary capacity for compensation of the extracellular respiratory acidosis. This is a common trait amongst water-breathing fishes, but has been found to be lacking in some air-breathing fishes (Shartau and Brauner, 2014), though not in others (Damsgaard et al., 2015; Gam et al., 2017).

The observation that the reduction in  $\text{pH}_a$  is indeed regulated, however, provides little novel insight into the regulated variable. The magnitude of  $\Delta\text{pH}_a/\Delta T$  in *M. albus* is consistent with the notion of maintaining constant protein (mainly imidazole) ionization (e.g. Reeves, 1972), but this obviously does not provide conclusive evidence for protein ionization being the regulated variable. Nevertheless, it is striking that plasma  $[\text{HCO}_3^-]$  remained constant across temperature, which, in combination with the lack of change in other extracellular ion concentrations, is consistent with the idea of constancy of protein ionization (Stewart, 1978). The biological significance of the reduction in pH with increased temperature is obviously of particular importance for the intracellular compartments where most protein function occurs (Malan et al., 1976; Reeves, 1977). Our measurements of  $\text{pH}_i$  from muscle, liver and heart indicate that the increase in temperature affected intracellular acid–base status, but the  $\Delta\text{pH}_i/\Delta T$  values were lower than those for blood pH, with the heart being the least affected. These data contrast with other studies where the  $\Delta\text{pH}/\Delta T$  of the heart was greater than that of other organs (muscle, liver and brain) (Table 5). However, Cameron and Kormanik (1982) reported  $\Delta\text{pH}_i/\Delta T$  to be lower in heart tissue than in blood in *Ictalurus punctatus*. Heisler et al. (1976) also reported differences amongst organs in dogfish and carp (Heisler, 1980) and the lower  $\Delta\text{pH}_i/\Delta T$  in the cardiac tissue of *Monopterus* may be associated with its very high levels of myoglobin in the ventricle (Damsgaard et al., 2014).

In conclusion, we demonstrate that *M. albus* reduces both  $\text{pH}_a$  and  $\text{pH}_i$  as temperature increases. The reduction in pH clearly seems to

reflect a change in the regulated set-point. In contrast to water-breathing fishes, but in accordance with an emerging pattern amongst air-breathing fishes, the lowering of pH is accomplished by a rise in  $P_{aCO_2}$  that may be a passive consequence of increased reliance on the air-breathing organ for  $CO_2$  excretion, as increased temperature stimulates metabolic  $CO_2$  production. It remains to be investigated, however, whether  $CO_2$ /pH-sensitive chemoreceptors also play a role in this response; clearly, this is an area for further research.

#### Competing interests

The authors declare no competing or financial interests.

#### Author contributions

Conceptualization: P.V.T., C.J.B., M.B., T.W.; Methodology: P.V.T., N.T.P., C.J.B., D.T.T.H., A.T.W., G.T.K., J.C., M.B., T.W.; Writing - original draft: P.V.T., T.W.; Writing - review & editing: N.T.P., C.J.B., D.T.T.H., A.T.W., G.T.K., J.C., M.B., T.W.; Supervision: N.T.P., D.T.T.H., M.B., T.W.; Funding acquisition: M.B., T.W.

#### Funding

The research was funded by the Danish Ministry of Foreign Affairs (Danida Fellowship Centre; Udenrigsministeriet) [DFC no. 12-014AU] and the Danish Council for Independent Research, Natural Sciences (Natur og Univers, Det Frie Forskningsråd).

#### References

- Amin-Naves, J., Giusti, H. and Glass, M. L.** (2004). Effects of acute temperature changes on aerial and aquatic gas exchange, pulmonary ventilation and blood gas status in the South American lungfish, *Lepidosiren paradoxa*. *Comp. Biochem. Physiol.* **138A**, 133-139.
- Austin, J. H., Sunderman, F. W. and Camack, J. G.** (1927). Studies in serum electrolytes II. The electrolyte composition and the pH of serum of a poikilothermous animal at different temperatures. *J. Biol. Chem.* **72**, 677-685.
- Baker, D. W., Matey, V., Huynh, K. T., Wilson, J. M., Morgan, J. D. and Brauner, C. J.** (2009a). Complete intracellular pH protection during extracellular pH depression is associated with hypercapnia tolerance in white sturgeon, *Acipenser transmontanus*. *Am. J. Physiol.* **296**, R1868-R1880.
- Baker, D. W., May, C. and Brauner, C. J.** (2009b). A validation of intracellular pH measurements in fish exposed to hypercapnia: the effect of duration of tissue storage and efficacy of the metabolic inhibitor tissue homogenate method. *J. Fish Biol.* **75**, 268-275.
- Boutilier, R. G., Iwama, G. K., Heming, T. A. and Randall, D. J.** (1985). The apparent pK of carbonic acid in rainbow trout blood plasma between 5 and 15°C. *Respir. Physiol.* **61**, 237-254.
- Boutilier, R. G., Glass, M. L. and Heisler, N.** (1987). Blood gases and extracellular/intracellular acid-base status as a function of temperature in the anuran amphibians *Xenopus laevis* and *Bufo marinus*. *J. Exp. Biol.* **130**, 13-25.
- Branco, L. G. S., Glass, M. L., Wang, T. and Hoffmann, A.** (1993). Temperature and central chemoreceptor drive to ventilation in toad (*Bufo paracnemis*). *Respir. Physiol.* **93**, 337-346.
- Brauner, C. J., Wang, T., Wang, Y., Richards, J. G., Gonzalez, R. J., Bernier, N. J., Xi, W., Patrick, M. and Val, A. L.** (2004). Limited extracellular but complete intracellular acid-base regulation during short-term environmental hypercapnia in the armoured catfish, *Liposarcus pardalis*. *J. Exp. Biol.* **207**, 3381-3390.
- Burton, R. F.** (2002). Temperature and acid-base balance in ectothermic vertebrates: the imidazole alaphastat hypotheses and beyond. *J. Exp. Biol.* **205**, 3587-3600.
- Cameron, J. N.** (1971). Rapid method for determination of total carbon dioxide in small blood samples. *J. Appl. Physiol.* **31**, 632-634.
- Cameron, J. N. and Kormanik, G. A.** (1982). Intracellular and extracellular acid-base status as a function of temperature in the freshwater channel catfish, *Ictalurus punctatus*. *J. Exp. Biol.* **99**, 127-142.
- Cameron, J. N. and Wood, C. M.** (1978). Renal function and acid-base regulation in two Amazonian erythrinid fishes: (*Hoplias malabaricus*), a facultative air breather. *Can. J. Zool.* **65**, 917-930.
- Damsgaard, C., Findorf, I., Helbo, S., Kocagoz, Y., Buchanan, R., Huang, D. T. T., Weber, R. E., Fago, A., Bayley, M. and Wang, T.** (2014). Very high blood oxygen in the air-breathing swamp eel *Monopterus albus*. *Comp. Biochem. Physiol.* **178**, 102-108.
- Damsgaard, C., Gam, L. T. H., Tuong, D. D., Thinh, P. V., Huang, D. T. T., Wang, T. and Bayley, M.** (2015). High capacity for extracellular acid-base regulation in the air-breathing fish *Pangasianodon hypophthalmus*. *J. Exp. Biol.* **218**, 1290-1294.
- Damsgaard, C., Thomsen, M. T., Bayley, M. and Wang, T.** (2018). Air-breathing changes the pattern for temperature-induced pH regulation in a bimodal breathing teleost. *J. Comp. Physiol.* (in press).
- Fobian, D., Overgaard, J. and Wang, T.** (2014). Oxygen transport is not compromised at high temperature in pythons. *J. Exp. Biol.* **217**, 3958-3961.
- Gam, L. T. H., Jensen, F. B., Damsgaard, C., Huang, D. T. T., Phuong, N. T. and Bayley, M.** (2017). Extreme nitrite tolerance in the clown knifefish *Chitala ornata* is linked to up-regulation of methaemoglobin reductase activity. *Aquat. Toxicol.* **187**, 9-17.
- Harter, T. S., Shartau, R. B., Brauner, C. J. and Farrell, A.P.** (2014). Validation of the i-STAT system for the analysis of blood parameters in fish. *Conserv. Physiol.* **2**, 1-12.
- Heisler, N.** (1980). Regulation of the acid-base status in fishes. In *Environmental Physiology of Fishes* (ed. M. A. Ali), pp. 123-162. New York: Plenum.
- Heisler, J. N., Weitz, H. and Weitz, A. M.** (1976). Extra and intracellular pH with changes of temperature in the dogfish *Scyliorhinus stellaris*. *Respir. Physiol.* **26**, 249-264.
- Hitzig, B. M. and Jackson, D. C.** (1978). Central chemical control of ventilation in the unanaesthetized turtle. *Am. J. Physiol.* **235**, R257-R264.
- Iversen, N. K., Lauridsen, H., Huang, D. T. T., Cong, N. V., Gesser, H., Buchanan, R., Bayley, M., Pedersen, M. and Wang, T.** (2013). Cardiovascular anatomy and cardiac function in the air-breathing swamp eel (*Monopterus albus*). *Comp. Biochem. Physiol.* **164A**, 171-180.
- Jackson, D. C.** (1989). Control of breathing. Effects of temperature. In *Comparative Pulmonary Physiology*, Vol. 39, (ed. S. C. Wood), pp. 621-641. New York, Basel: Marcel Dekker.
- Larry, I. C.** (1979). Responses to rapid temperature change in Vertebrate Ectotherms. *Integr. Comp. Biol.* **19**, 225-237.
- Lefevre, S., Findorf, I., Bayley, M., Huang, D. T. T. and Wang, T.** (2016). Increased temperature tolerance of the air-breathing Asian swamp eel *Monopterus albus* after high-temperature acclimation is not explained by improved cardio-respiratory performance. *J. Fish. Biol.* **88**, 418-432.
- Malan, A., Wilson, T. L. and Reeves, R. B.** (1976). Intracellular pH in cold-blooded vertebrates as a function of body temperature. *Respir. Physiol.* **17**, 45-61.
- Milsom, W. K.** (2010). The phylogeny of central chemoreception. *Respir. Physiol.* **173**, 195-200.
- Moalli, R., Meyers, R. S., Uitsch, G. R. and Jackson, D. C.** (1981). Acid-base balance and temperature in a predominantly skin-breathing salamander, *Cryptobranchus alleganiensis*. *Respir. Physiol.* **43**, 1-11.
- MRC** (2009). Adaptation to climate change in the countries of the Lower Mekong Basin: regional synthesis report. MRC Technical Paper No. 24. Vientiane: Mekong River Commission.
- Pörtner, H. O., Boutilier, R. G., Tang, Y. and Toews, D. P.** (1990). Determination of intracellular pH and PCO<sub>2</sub> values after metabolic inhibition by fluoride and nitrotriacetic acid. *Respir. Physiol.* **81**, 255-274.
- Rahn, H.** (1966). Aquatic gas exchange: theory. *Respir. Physiol.* **1**, 1-12.
- Rahn, H., Rahn, K. B., Howell, B. J., Gans, C. and Tenney, S. M.** (1971). Air breathing of the garfish (*Lepisosteus osseus*). *Respir. Physiol.* **11**, 285-307.
- Rainboth, W. J.** (1996). *Fishes of Cambodian Mekong*. FAO species identification field guide for fishery purposes. Rome: FAO.
- Randall, D. J. and Cameron, J. N.** (1973). Respiratory control of arterial pH as temperature changes in rainbow trout *Salmo gairdneri*. *Am. J. Physiol.* **225**, 997-1002.
- Reeves, R. B.** (1972). An imidazole alaphastat hypothesis for vertebrate acid-base regulation: Tissue carbon dioxide content and body temperature in bullfrogs. *Respir. Physiol.* **14**, 219-236.
- Reeves, R. B.** (1977). The interaction of body temperature and acid-base balance in ectothermic vertebrates. *Annu. Rev. Physiol.* **39**, 559-586.
- Shafland, P. L., Gestring, K. B. and Stanford, M. S.** (2009). An assessment of the Asian swamp eel (*Monopterus albus*) in Florida. *Rev. Fish. Sci.* **18**, 25-39.
- Shartau, R. B. and Brauner, C. J.** (2014). Acid-base and ion balance in fishes with bimodal respiration. *J. Fish. Biol.* **84**, 682-704.
- Shih, H. J.** (1940). On the foods of *Monopterus*. *Sinensia* **11**, 573-576.
- Smatresk, N. J. and Cameron, J. N.** (1982). Respiration and acid-base physiology of the spotted gar, a bimodal breather: II. Responses to temperature change and hypercapnia. *J. Exp. Biol.* **96**, 281-293.
- Stewart, P. A.** (1978). Independent and dependent variables of acid-base control. *Respir. Physiol.* **33**, 9-26.
- Stinner, J. N. and Hartzler, L. K.** (2000). Effect of temperature on pH and electrolyte concentration in air-breathing ectotherms. *J. Exp. Biol.* **203**, 2065-2074.
- Truchot, J. P.** (1987). *Comparative Aspects of Extracellular Acid-Base Balance*. Berlin: Springer-Verlag.
- Uitsch, G. R. and Jackson, D. C.** (1996). *pH and Temperature in Ectothermic Vertebrates*. Bulletin Alabama Museum of Natural History, Number 18, pp. 1-42.
- Walsh, P. J. and Moon, T. W.** (1982). The influence of temperature on extracellular and intracellular pH in the American eel, *Anguilla rostrata* (Le Sueur). *Respir. Physiol.* **50**, 129-140.
- Wang, T. and Jackson, D. C.** (2016). How and why pH changes with body temperature: the  $\alpha$ -stat hypothesis. *J. Exp. Biol.* **219**, 1090-1092.
- Wang, T., Abe, A. S. and Glass, M. L.** (1998a). Temperature effects on lung and blood gases in *Bufo paracnemis*: consequences of bimodal gas exchange. *Respir. Physiol.* **113**, 231-238.
- Wang, T., Abe, A. S. and Glass, M. L.** (1998b). Effects of temperature on lung and blood gases in the South American rattlesnake *Crotalus durissus terrificus*. *Comp. Biochem. Physiol.* **121A**, 7-11.
